# Supplementary material for: Secondary bloodstream infection in critically ill patients with COVID-19
Source: PubMed Central journal article supplement — J Int Med Res. 2021 Dec 13;49(12):03000605211062783. doi: 10.1177/03000605211062783 (PMC8671686; doi:10.1177/03000605211062783), 2021-12-13
Supplement: sj-pdf-1-imr-10.1177_03000605211062783.pdf [file sj-pdf-1-imr-10.1177_03000605211062783.pdf]

**荆门市第一人民医院伦理委员会**  
**IRB of First people's hospital of Jingmen**  
**伦理审查批件**

**Approve Notice**

批件号：荆门市第一人民医院伦理委员会 202002007

|                                                                                                                                                                                                                                     |                                            |      |                                                                        |
|-------------------------------------------------------------------------------------------------------------------------------------------------------------------------------------------------------------------------------------|--------------------------------------------|------|------------------------------------------------------------------------|
| 审查日期                                                                                                                                                                                                                                | 2020年4月3日                                  | 审查地点 | 423室                                                                   |
| 项目名称                                                                                                                                                                                                                                | 新型冠状病毒肺炎患者临床特征分析                           |      |                                                                        |
| 项目来源                                                                                                                                                                                                                                | 自选                                         |      |                                                                        |
| 研究负责单位                                                                                                                                                                                                                              | 荆门市第一人民医院                                  |      |                                                                        |
| 参加单位                                                                                                                                                                                                                                | 浙江大学医学院附属邵逸夫医院                             |      |                                                                        |
| 本中心主要研究者                                                                                                                                                                                                                            | 易军                                         |      |                                                                        |
| 审查类别                                                                                                                                                                                                                                | 科研项目审查                                     | 审查方式 | <input type="checkbox"/> 会议审查 <input checked="" type="checkbox"/> 快速审查 |
| 审查文件                                                                                                                                                                                                                                | 研究方案 知情同意书 项目组成员信息                         |      |                                                                        |
| 根据中华人民共和国国家药品监督管理局2010年颁布实施的《药物临床试验伦理审查工作指导原则》及《赫尔辛基宣言》和国际医学科学组织委员会颁布的《人体生物医学研究国际道德指南》等伦理原则，经本伦理委员会审查：                                                                                                                              | <input checked="" type="checkbox"/> 同意临床研究 |      |                                                                        |
|                                                                                                                                                                                                                                     | <input type="checkbox"/> 不同意临床研究           |      |                                                                        |
|                                                                                                                                                                                                                                     | <input type="checkbox"/> 终止或暂停临床研究         |      |                                                                        |
| 批件有效期                                                                                                                                                                                                                               | 壹年                                         | 联系电话 | 0724-2305985                                                           |
| 委员会主席签字：<br><div style="text-align: center;"> <br/>  </div> |                                            |      |                                                                        |

本审查自签发日期有效期一年。研究负责人必须严格使用经审查同意的知情同意书文本和研究方案。如伦理审查批件失效时才能完成所有的临床研究（包括统计分析），请在本批件失效前一个月，递交跟踪审查申请报告。如研究结束并在审查有效期内，请递交结题研究报告。研究中发生严重不良事件及影响研究风险事益比的非预期不良事件，应立刻报告本伦理委员会；任何研究方案、知情同意书的修改，包括研究人员的变更等，必须递交修正方案伦理审查申请表，经伦理审查委员会审查获得批准后执行。

备注：“01”代表新科技新项目伦理审查；“02”代表科技项目伦理审查
